# Supplementary material
Source: HighWire-hosted journal article supplement (https://bjsm.bmj.com/content/54/24/1468)
Supplement: inline-supplementary-material-1 [file inline-supplementary-material-1.pdf]

Supplemental Table. Examples of nationally representative studies and large cohorts with device-measures

| Survey or cohort                                                                | Dates                                                         | Participant ages                             | Device                                        | Wear location/time          | Approximate sample size  |
|---------------------------------------------------------------------------------|---------------------------------------------------------------|----------------------------------------------|-----------------------------------------------|-----------------------------|--------------------------|
| National Health and Nutrition Study of Japan <sup>1</sup>                       | Annually since 1989                                           | 15 and older (20 and older since 2012)       | Pedometer Yamasa AS-200                       | Waist/waking                | n ~ 3,500-4,000 per year |
| National Health and Nutrition Examination Survey (NHANES) <sup>2 3</sup>        | 2003-2006                                                     | 6 and older                                  | ActiGraph AM-7164                             | Waist/waking                | n ~ 7,000 per cycle      |
|                                                                                 | 2011-2014                                                     | 3 and older (ages 6 and older for 2011 only) | ActiGraph GT3X+                               | Non-dominant wrist/24-hours |                          |
| Portuguese Population Study <sup>4</sup>                                        | 2006-2008                                                     | 10 and older                                 | ActiGraph GT1M                                | Waist/waking                | n ~ 4,700                |
| Norwegian Children Study <sup>5</sup>                                           | 2005-2006                                                     | 9 and 15 years                               | ActiGraph 7164                                | Waist/waking                | n ~ 2,300                |
| Canadian Health Measures Survey <sup>6</sup>                                    | 2007-2009<br>2009-2011<br>2012-2013<br>2014-2015<br>2015-2017 | 3-79 years (ages 6-79 for cycle 1 2007-2009) | Actical                                       | Waist/waking                | n ~ 5,000 per cycle      |
| Health Survey for England <sup>7</sup>                                          | 2008                                                          | 4 and older                                  | ActiGraph GT1M                                | Waist/waking                | n ~ 2,000                |
| Australian National Nutrition and Physical Activity Survey (NNPAS) <sup>8</sup> | 2011-2012                                                     | 5 and older                                  | Pedometer G sensor model 2026                 | Waist/waking                | n ~ 6,000                |
| Finnish Health 2011 Study <sup>9</sup>                                          | 2011-2012                                                     | 18-85 years                                  | Hookie AM1 20                                 | Waist/waking                | n ~ 1,500                |
| Swedish Attitude, Behavior and Change (ABC) Study <sup>10</sup>                 | 2002<br>2008                                                  | 18-74 years                                  | ActiGraph MTI (2002)<br>ActiGraph 7164 (2008) | Waist/waking                | n ~ 1,100 and 500        |
| Latin American Study of Nutrition and Health (ELANS) <sup>11</sup>              | 2014-2015                                                     | 15-65 years                                  | ActiGraph GT3X                                | Waist/waking                | n ~ 2700                 |
| <b>Selected Large (n &gt;1000) cohorts</b>                                      |                                                               |                                              |                                               |                             |                          |
| European                                                                        | 1997-1998                                                     | 9-15 years                                   | MTI                                           | Waist/waking                | n ~ 4,000                |

|                                                                                                                                 |                 |                                                     |                                     |                |                                                          |
|---------------------------------------------------------------------------------------------------------------------------------|-----------------|-----------------------------------------------------|-------------------------------------|----------------|----------------------------------------------------------|
| Youth Heart Study (EYHS) <sup>12</sup>                                                                                          |                 |                                                     | ActiGraph 7164                      |                | 6- and 12- year follow-up completed in certain countries |
| Avon Longitudinal Study of Parents and Children (ALSPAC) <sup>13 14</sup>                                                       | 2001-2009       | Children: 11/12 years<br>13/14 years<br>15/16 years | ActiGraph AM 7164 or ActiGraph GTM1 | Waist/waking   | n ~ 6,000 children subsample                             |
| Personal and Environmental Associations with Children's Health (PEACH) <sup>15</sup>                                            | 2006-2008       | 10-11 years                                         | ActiGraph GT1M                      | Waist/waking   | n ~ 1,300                                                |
| Child Heart and Health Study in England (CHASE) <sup>16</sup>                                                                   | 2006-2007       | 9-10 years                                          | ActiGraph GT1M                      | Waist/waking   | n ~ 2,000                                                |
| Sport Physical Activity & Eating Behaviour: Environmental Determinants in Young People (SPEEDY) <sup>17</sup>                   | 2007            | 9-10 years                                          | ActiGraph GT1M                      | Waist/waking   | n ~ 2,000                                                |
| Identification and Prevention of Dietary- and Lifestyle- Induced Health Effects in Children and Infants (IDEFICS) <sup>18</sup> | 2007-2008       | 2-11 years                                          | ActiGraph ActiTrainer or GT1M       | Waist/waking   | n ~ 7,000                                                |
| Millennium Cohort Study <sup>19</sup>                                                                                           | MCS4: 2008-2009 | 7 years                                             | ActiGraph GT1M                      | Waist/waking   | n ~ 4,000                                                |
|                                                                                                                                 | MCS6: 2015-2016 | 14 years                                            | GENEActiv                           | Wrist/24-hours |                                                          |
| Activity and Function of the Elderly in Ulm (ActiFE Ulm) <sup>20</sup>                                                          | 2009-2010       | 65 and older                                        | ActivPAL                            | Thigh/24-hours | n ~ 1,200                                                |

|                                                                                                                         |                     |                                            |                     |                             |                                                    |
|-------------------------------------------------------------------------------------------------------------------------|---------------------|--------------------------------------------|---------------------|-----------------------------|----------------------------------------------------|
| REasons for Geographic and Racial Differences in Stroke (REGARDS) ancillary study <sup>21</sup>                         | 2009-2013           | black and white participants, 45 and older | Actical             | Waist/waking                | n ~ 8,000                                          |
| Western Australian Pregnancy Cohort (Raine) Study <sup>22</sup>                                                         | 2011                | 22-23 years                                | ActiGraph GT3X+ x 2 | Waist + wrist/24-hours      | 1989 Birth cohort<br>n ~ 2,000<br>Year 22: n ~ 900 |
| International Study of Childhood Obesity, Lifestyle and the Environment (ISCOLE) <sup>23</sup>                          | 2011-2013           | 9-11 years                                 | ActiGraph GT3X+     | Waist/24-hours              | n ~ 7,000                                          |
| Pelotas Birth Cohorts <sup>24</sup>                                                                                     | 2004 Cohort 2010    | ~6 years                                   | GENEActiv           | Wrist/24-hours              | n ~ 2,600                                          |
|                                                                                                                         | 1993 Cohort 2011    | ~18 years                                  | GENEActiv           | Wrist/24-hours              | n ~3,600                                           |
|                                                                                                                         | 1982 Cohort 2012-13 | ~30 years                                  | GENEActiv           | Wrist/24-hours              | n ~2,700                                           |
| Women's Health Initiative – Objective Physical Activity and Cardiovascular Health ancillary study (OPACH) <sup>25</sup> | 2012-2014           | women 63 and older                         | ActiGraph GT3X+     | Waist/waking                | n ~ 7,000                                          |
| German National Cohort Study <sup>26</sup>                                                                              | 2013-2019           | 20-69 years                                | ActiGraph GT3X+     | Waist/24-hours              | n ~ 200,000                                        |
| Tromsø Study <sup>27</sup>                                                                                              | Tromsø 7: 2015-2016 | 40 and older                               | ActiGraph wGT3X-BT  | Waist/24-hours              | n ~ 6,300                                          |
| UK Biobank <sup>28</sup>                                                                                                | 2013-2015           | 45-79 years                                | Axivity AX3         | Wrist/24-hours              | n ~ 100,000                                        |
| Nord-Trøndelag Health Study (HUNT) 4 <sup>29</sup>                                                                      | 2017-19             | 13 and older                               | Axivity AX3 x 2     | Thigh + lower back/24-hours | n ~ 38,000                                         |

## REFERENCES

1. Katanoda K, Matsumura Y. National Nutrition Survey in Japan. *Journal of nutritional science and vitaminology* 2002;48(5):423-32.
2. Troiano RP, Berrigan D, Dodd KW, et al. Physical activity in the United States measured by accelerometer. *Med Sci Sports Exerc* 2008;40(1):181-8. doi: 10.1249/mss.0b013e31815a51b3 [published Online First: 2007/12/20]
3. Troiano RP, McClain JJ, Brychta RJ, et al. Evolution of accelerometer methods for physical activity research. *Br J Sports Med* 2014;48(13):1019-23. doi: 10.1136/bjsports-2014-093546 [published Online First: 2014/05/02]
4. Baptista F, Santos DA, Silva AM, et al. Prevalence of the Portuguese population attaining sufficient physical activity. *Med Sci Sports Exerc* 2012;44(3):466-73. doi: 10.1249/MSS.0b013e318230e441 [published Online First: 2011/08/17]
5. Kolle E, Steene-Johannessen J, Andersen LB, et al. Objectively assessed physical activity and aerobic fitness in a population-based sample of Norwegian 9- and 15-year-olds. *Scand J Med Sci Sports* 2010;20(1):e41-7. doi: 10.1111/j.1600-0838.2009.00892.x [published Online First: 2009/05/09]
6. Tremblay M, Wolfson M, Gorber SC. Canadian Health Measures Survey: rationale, background and overview. *Health Reports* 2007;18:7-20.
7. Scholes S, Coombs N, Pedisic Z, et al. Age- and sex-specific criterion validity of the health survey for England Physical Activity and Sedentary Behavior Assessment Questionnaire as compared with accelerometry. *Am J Epidemiol* 2014;179(12):1493-502. doi: 10.1093/aje/kwu087 [published Online First: 2014/05/28]
8. Australian Bureau of Statistics. 4364.0.55.004 - Australian Health Survey: Users' Guide, 2011–13 2013 [Available from: <https://www.abs.gov.au/AUSSTATS/abs@.nsf/Lookup/4363.0.55.001Main+Features12011-13?OpenDocument> accessed 2 May 2020.
9. Husu P, Suni J, Vähä-Ypyä H, et al. Objectively measured sedentary behavior and physical activity in a sample of Finnish adults: a cross-sectional study. *BMC Public Health* 2016;16(1):920. doi: 10.1186/s12889-016-3591-y
10. Hagströmer M, Kwak L, Oja P, et al. A 6 year longitudinal study of accelerometer-measured physical activity and sedentary time in Swedish adults. *Journal of Science and Medicine in Sport* 2015;18(5):553-57. doi: <https://doi.org/10.1016/j.jsams.2014.07.012>
11. Ferrari GLM, Kovalskys I, Fisberg M, et al. Socio-demographic patterning of objectively measured physical activity and sedentary behaviours in eight Latin American countries: Findings from the ELANS study. *Eur J Sport Sci* 2019;1-12. doi: 10.1080/17461391.2019.1678671 [published Online First: 2019/10/12]
12. Riddoch C, Edwards D, Page A, et al. The European Youth Heart Study—Cardiovascular Disease Risk Factors in Children: Rationale, Aims, Study Design, and Validation of Methods. *Journal of Physical Activity and Health* 2005;2(1):115-29. doi: 10.1123/jpah.2.1.115
13. Mattocks C, Ness A, Leary S, et al. Use of Accelerometers in a Large Field-Based Study of Children: Protocols, Design Issues, and Effects on Precision. *Journal of Physical Activity and Health* 2008;5(s1):S98-S111. doi: 10.1123/jpah.5.s1.s98
14. Riddoch CJ, Leary SD, Ness AR, et al. Prospective associations between objective measures of physical activity and fat mass in 12-14 year old children: the Avon Longitudinal Study

- of Parents and Children (ALSPAC). *BMJ* 2009;339(nov26 2):b4544-b444. doi: 10.1136/bmj.b4544
15. Page AS, Cooper AR, Griew P, et al. Independent mobility in relation to weekday and weekend physical activity in children aged 10–11 years: The PEACH Project. *International Journal of Behavioral Nutrition and Physical Activity* 2009;6(1):2. doi: 10.1186/1479-5868-6-2
16. Owen CG, Nightingale CM, Rudnicka AR, et al. Ethnic and gender differences in physical activity levels among 9-10-year-old children of white European, South Asian and African-Caribbean origin: the Child Heart Health Study in England (CHASE Study). 2009;38(4):1082-93. doi: 10.1093/ije/dyp176
17. Van Sluijs EM, Skidmore PM, Mwanza K, et al. Physical activity and dietary behaviour in a population-based sample of British 10-year old children: the SPEEDY study (Sport, Physical activity and Eating behaviour: Environmental Determinants in Young people). *BMC Public Health* 2008;8(1):388. doi: 10.1186/1471-2458-8-388
18. Konstabel K, Veidebaum T, Verbestel V, et al. Objectively measured physical activity in European children: the IDEFICS study. *International Journal of Obesity* 2014;38(S2):S135-S43. doi: 10.1038/ijo.2014.144
19. Gilbert E, Conolly A, Tietz S, et al. Measuring young people's physical activity using accelerometers in the UK Millennium Cohort Study. *Centre for Longitudinal Studies Working Paper* 2017
20. Denking MD, Franke S, Rapp K, et al. Accelerometer-based physical activity in a large observational cohort-study protocol and design of the activity and function of the elderly in Ulm (ActiFE Ulm) study. *BMC geriatrics* 2010;10(1):50.
21. Howard VJ, Rhodes JD, Mosher A, et al. Obtaining Accelerometer Data in a National Cohort of Black and White Adults. *Medicine & Science in Sports & Exercise* 2015;47(7):1531-37. doi: 10.1249/mss.0000000000000549
22. Straker LM, Hall GL, Mountain J, et al. Rationale, design and methods for the 22 year follow-up of the Western Australian Pregnancy Cohort (Raine) Study. *BMC Public Health* 2015;15(1) doi: 10.1186/s12889-015-1944-6
23. Katzmarzyk PT, Barreira TV, Broyles ST, et al. The International Study of Childhood Obesity, Lifestyle and the Environment (ISCOLE): design and methods. *BMC Public Health* 2013;13(1):900. doi: 10.1186/1471-2458-13-900
24. Ricardo LIC, Wendt A, Galliano LM, et al. Number of days required to estimate physical activity constructs objectively measured in different age groups: Findings from three Brazilian (Pelotas) population-based birth cohorts. *PLoS One* 2020;15(1):e0216017. doi: 10.1371/journal.pone.0216017 [published Online First: 2020/01/11]
25. Lacroix AZ, Rillamas-Sun E, Buchner D, et al. The Objective Physical Activity and Cardiovascular Disease Health in Older Women (OPACH) Study. *BMC Public Health* 2017;17(1) doi: 10.1186/s12889-017-4065-6
26. German National Cohort (GNC) Consortium. The German National Cohort: aims, study design and organization. *European Journal of Epidemiology* 2014;29(5):371-82. doi: 10.1007/s10654-014-9890-7
27. Sagelv EH, Ekelund U, Pedersen S, et al. Physical activity levels in adults and elderly from triaxial and uniaxial accelerometry. The Tromsø Study. *PLOS ONE* 2019;14(12):e0225670. doi: 10.1371/journal.pone.0225670

28. Doherty A, Jackson D, Hammerla N, et al. Large Scale Population Assessment of Physical Activity Using Wrist Worn Accelerometers: The UK Biobank Study. *PLOS ONE* 2017;12(2):e0169649. doi: 10.1371/journal.pone.0169649
29. Nord-Trøndelag Health Study. The Nord-Trøndelag Health Study. HUNT4 [Available from: <https://www.ntnu.edu/hunt4> accessed 2 May 2020].
